# Supplementary material for: Τhe Nematicidal Potential of Bioactive Streptomyces Strains Isolated from Greek Rhizosphere Soils Tested on Arabidopsis Plants of Varying Susceptibility to Meloidogyne spp
Source: MDPI journal article supplement (doi:10.3390/plants9060699), 2020-05-30
Supplement: s1 [file s1]

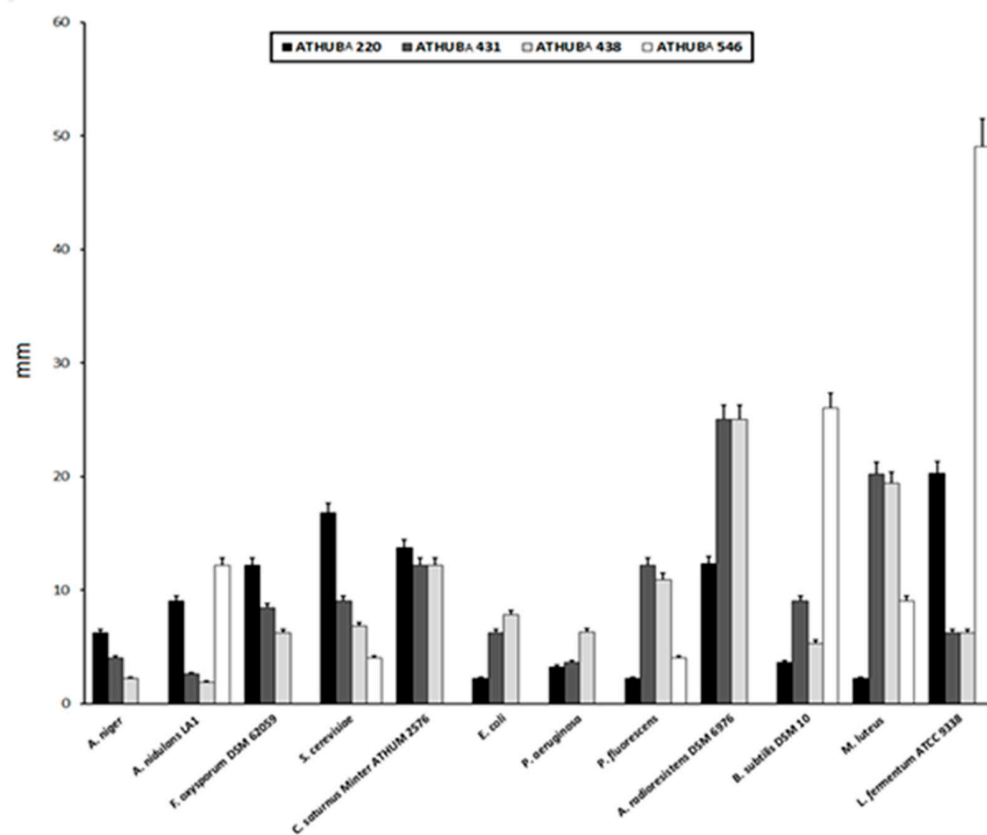

**Figure S1.** The inhibition halo diameter (mm± standard error) of the four *Streptomyces* isolates (ATHUBA 220, ATHUBA 431, ATHUBA 438 and ATHUBA 546) displaying nematocidal activity.
